# Supplementary material for: Mental Health and Obesity Among Veterans: A Possible Need for Integrated Care
Source: Atypon-hosted journal article supplement (doi:10.1176/appi.ps.201900078), 2020-01-30
Supplement: appi.ps.201900078.ds001.pdf [file appi.ps.201900078.ds001.pdf]

**Supplemental Figure 1.** Rates of mental health diagnoses among veteran VHA primary care patients in fiscal year 2014 within weight categories

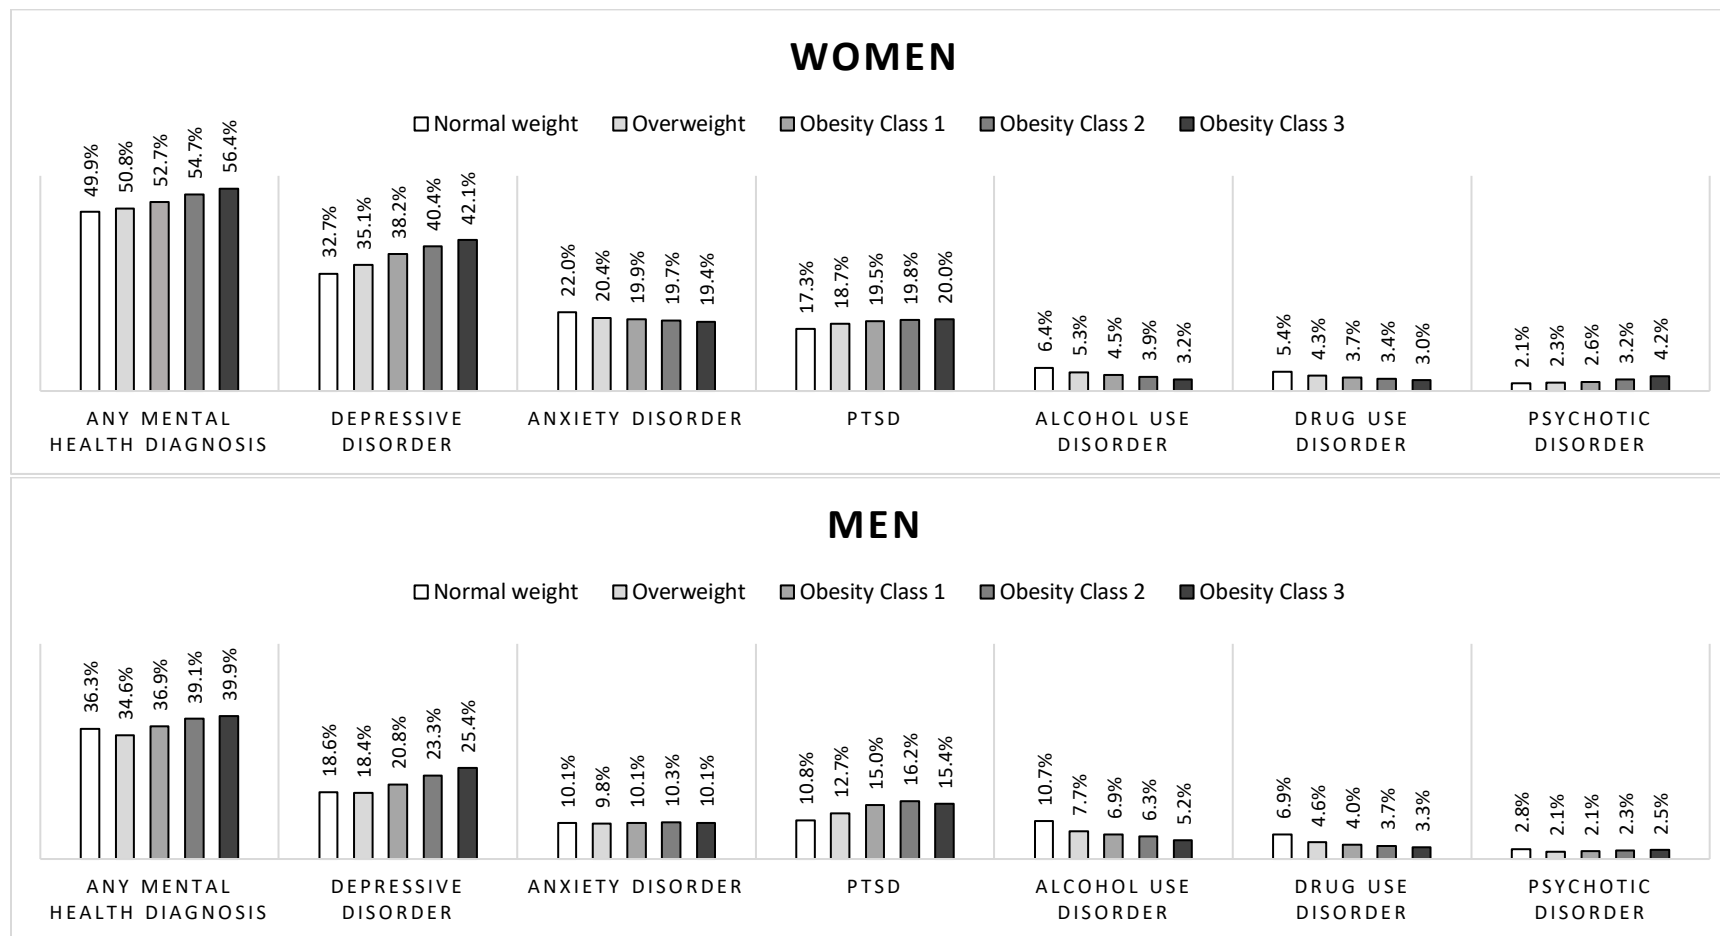

VHA: Veterans Health Administration; PTSD: post-traumatic stress disorder; Normal weight:  $18.5 \text{ kg/m}^2 \leq \text{BMI} < 25 \text{ kg/m}^2$  Overweight:  $25 \text{ kg/m}^2 \leq \text{BMI} < 30 \text{ kg/m}^2$ ; Obesity class 1:  $30 \text{ kg/m}^2 \leq \text{BMI} < 35 \text{ kg/m}^2$ ; Obesity class 2:  $35 \text{ kg/m}^2 \leq \text{BMI} < 40 \text{ kg/m}^2$ ; Obesity class 3:  $40 \text{ kg/m}^2 \leq \text{BMI}$ . Note: percents are *within* weight category percents. For example, 49.9% of women with normal weight had any mental health diagnosis, whereas 50.8% of women with overweight had any mental health diagnosis.
